# Supplementary material for: The Efficacy of New Zealand Greenshell™ Mussel Powder Supplementation in Supporting Muscle Recovery Following Eccentric Exercise-Induced Muscle Damage in Healthy, Untrained Adult Males
Source: MDPI journal article supplement (doi:10.3390/nu15102316), 2023-05-15
Supplement: s1 [file s1]

## Supplementary data:

**Table S1.** Plasma cytokine concentrations before and at selected timepoints after the bench-stepping exercise.

| Cytokine | Placebo    |            |           |            |           | GSM        |            |            |           |           |
|----------|------------|------------|-----------|------------|-----------|------------|------------|------------|-----------|-----------|
|          | Pre        | Post       | 24 h      | 48 h       | 72 h      | Pre        | Post       | 24 h       | 48 h      | 72 h      |
| IL-4     | 4.9 ± 2.6  | 4.8 ± 2.5  | 4.2 ± 2.3 | 3.6 ± 1.9  | 2.8 ± 1.5 | 7.5 ± 4.0  | 7.5 ± 3.9  | 6.0 ± 3.2  | 5.2 ± 2.8 | 5.3 ± 2.9 |
| IL-2     | 1.7 ± 0.8  | 1.9 ± 0.9  | 1.5 ± 0.7 | 1.6 ± 0.7  | 1.4 ± 0.6 | 2.7 ± 1.3  | 2.3 ± 1.1  | 2.2 ± 1.0  | 2.2 ± 0.9 | 1.8 ± 0.8 |
| CXCL-10  | 7.5 ± 3.0  | 9.8 ± 3.6  | 8.4 ± 3.4 | 7.6 ± 2.8  | 6.8 ± 2.6 | 11.3 ± 4.5 | 12.1 ± 4.4 | 11.2 ± 4.5 | 8.1 ± 2.9 | 7.8 ± 3.0 |
| IL-1β    | 10.6 ± 4.5 | 14.3 ± 6.2 | 9.3 ± 4.0 | 10.0 ± 4.1 | 6.4 ± 2.6 | 11.9 ± 5.1 | 9.8 ± 4.2  | 6.7 ± 2.9  | 7.6 ± 3.1 | 7.0 ± 2.9 |
| TNF-α    | 1.2 ± 0.5  | 1.3 ± 0.6  | 1.1 ± 0.5 | 1.0 ± 0.4  | 1.0 ± 0.4 | 1.7 ± 0.7  | 1.6 ± 0.7  | 1.3 ± 0.6  | 1.1 ± 0.4 | 1.0 ± 0.4 |
| IL-17A   | 0.8 ± 0.3  | 0.9 ± 0.3  | 0.8 ± 0.3 | 0.7 ± 0.3  | 0.6 ± 0.2 | 1.2 ± 0.4  | 1.0 ± 0.4  | 1.0 ± 0.4  | 0.9 ± 0.3 | 0.7 ± 0.3 |
| IL-6     | 2.7 ± 1.3  | 3.8 ± 1.8  | 2.5 ± 1.3 | 2.1 ± 0.9† | 1.7 ± 0.9 | 5.0 ± 2.4  | 5.6 ± 2.7  | 3.3 ± 1.7  | 2.8 ± 1.4 | 2.5 ± 1.2 |
| IL-10    | 1.0 ± 0.4  | 1.2 ± 0.5  | 0.8 ± 0.3 | 0.8 ± 0.3† | 0.7 ± 0.2 | 1.3 ± 0.5  | 1.2 ± 0.5  | 0.9 ± 0.4  | 0.8 ± 0.3 | 0.7 ± 0.3 |
| IFN-γ    | 3.1 ± 1.3  | 3.9 ± 1.7  | 2.6 ± 1.1 | 3.2 ± 1.2  | 2.3 ± 0.9 | 4.9 ± 2.1  | 4.8 ± 2.1  | 3.7 ± 1.6  | 2.8 ± 1.1 | 3.0 ± 1.3 |
| IL-12p70 | 1.3 ± 0.6  | 1.7 ± 0.8  | 1.0 ± 0.5 | 1.0 ± 0.5† | 0.9 ± 0.4 | 2.2 ± 1.0  | 2.1 ± 1.0  | 1.9 ± 0.9^ | 1.3 ± 0.6 | 1.4 ± 0.6 |
| IL-8     | 1.3 ± 0.5  | 1.6 ± 0.6  | 1.3 ± 0.5 | 1.3 ± 0.4  | 1.1 ± 0.4 | 1.7 ± 0.6  | 1.7 ± 0.6  | 1.4 ± 0.5  | 1.2 ± 0.4 | 1.2 ± 0.4 |
| TFG-β    | 1.1 ± 0.6  | 1.2 ± 0.8  | 0.8 ± 0.5 | 0.7 ± 0.4† | 0.8 ± 0.4 | 1.2 ± 0.7  | 1.2 ± 0.7  | 0.9 ± 0.5  | 0.7 ± 0.4 | 0.7 ± 0.4 |

Cytokine concentrations in plasma samples pre-exercise, immediately post exercise and 24, 48 and 72 h after the bench-stepping exercise. Data are means ± SEM.

Abbreviations: GSM, Greenshell™ mussel; IL, interleukin; CXCL, C-X-C motif chemokine ligand; MCP, monocyte chemoattractant protein; TNF, tumour necrosis factor; IFN, interferon; TGF, transforming growth factor.

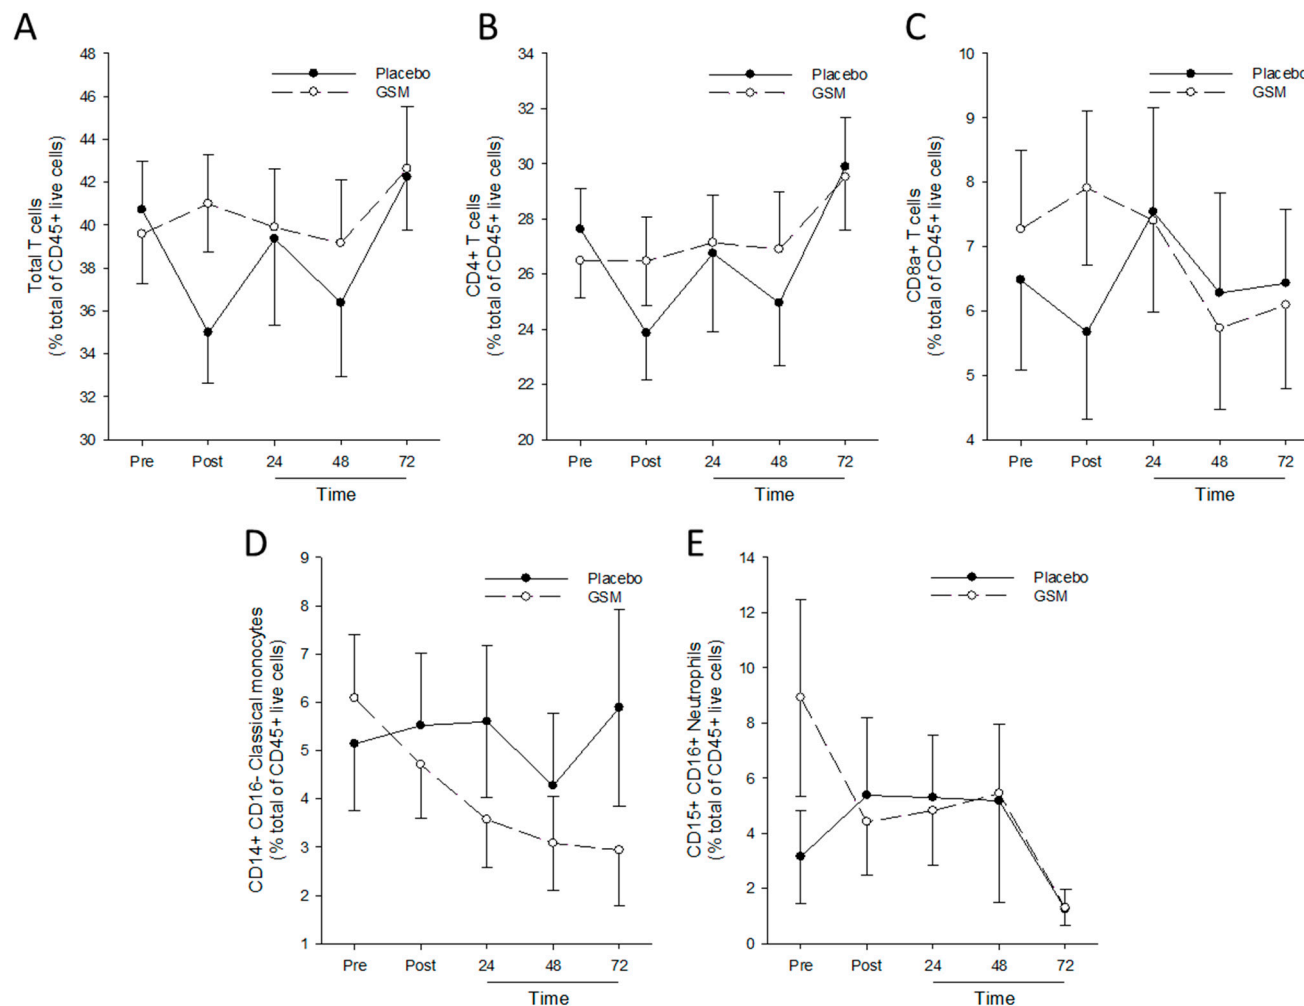

**Figure S1.** Relative cell counts of circulating total T cells (A), CD4+ T cells (B), CD8a+ T cells (C), CD14+ CD16- monocytes (D) and CD15+ CD16+ neutrophils (E) pre-exercise (Pre) and 0 (Post), 24, 48 and 72 h after bench-stepping exercise in placebo and Greenshell™ mussel (GSM) intervention groups. Data are means  $\pm$  SEM.
